# Supplementary material for: TRPM7 is essential for Mg2+ homeostasis in mammals
Source: PubMed Central journal article supplement — Nat Commun. 2010 Nov 2;1:109–. doi: 10.1038/ncomms1108 (PMC3060619; doi:10.1038/ncomms1108), 2010-11-02
Supplement: ncomms1108-s1.pdf [file ncomms1108-s1.pdf]

## SUPPLEMENTARY INFORMATION

### TRPM7 controls $Mg^{2+}$ homeostasis in mammals

Lillia V. Ryazanova, Lusliany J. Rondon, Susanna Zierler, Zhixian Hu, Joanna Galli, Terry P. Yamaguchi, Andrzej Mazur, Andrea Fleig, and Alexey G. Ryazanov

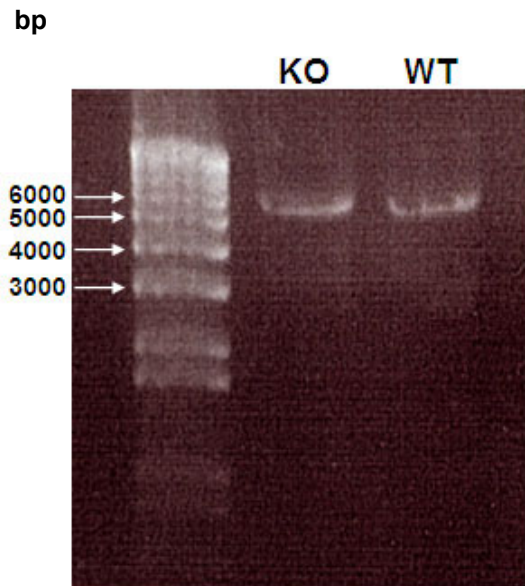

**Supplementary Figure S1: Analysis of TRPM6 expression in ES cells.** Total RNA was isolated from wild type (WT) and  $TRPM7^{\Delta kinase/\Delta kinase}$  (KO) ES cells using RNeasy Mini Kit. cDNA was generated using Superscript II Reverse Transcriptase (Invitrogen). Primers for amplification of TRPM6 from the cDNA were 5'-*tcaggtcaagaaatcctgg*-3' and 5'-*aatggttgcccaaattcca*-3'. Advantage 2 PCR Kit was used for the amplification and cycling parameters were the following: 95°C – 30s, 68°C – 6m repeated for 35 cycles. Expected length of the product was 6087 bp.

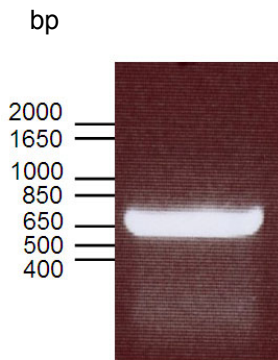

**Supplementary Figure S2: Analysis of Trpm7 mRNA in  $Trpm7^{\Delta kinase/\Delta kinase}$  ES cells.**

Total RNA was isolated from  $TRPM7^{\Delta kinase/\Delta kinase}$  (KO) ES cells using RNeasy Mini Kit. cDNA was generated using Superscript II Reverse Transcriptase (Invitrogen). Primers for amplification of TRPM7 from the cDNA were 5'-acggatcccagaaagctgtagtagaa-3' (anneals to exon 29) and 5'-acagtactaaaacctgtcacaggat-3' (anneals to exon 39, reverse). Advantage 2 PCR Kit was used for the amplification and cycling parameters were the following: 95°C – 30s, 55°C – 1m, 68°C-1m repeated for 5 cycles followed by 95°C – 30sec, 60°C – 1m, 68°C – 1m repeated for 25 cycles. The PCR product shown in the figure was subcloned into TOPO-TA vector (Invitrogen) and then sequenced.
